# Supplementary material
Source: PubMed Central journal article supplement (PMC10270174)
Supplement: S1368980018001854sup001.pdf [file S1368980018001854sup001.pdf]

## Supplemental Material

“Dietary Protein and Changes in Markers of Cardiometabolic Health across 20 Years of Follow-Up in Middle-Age Americans.”

### Contents

**Supplemental Figure 1.** Diagram of mixed model approach of analyzing annualized changes in cardiometabolic outcomes.

**Supplemental Table 1.** Mean protein intake and status at baseline by body mass index category in 3,066 participants of the Framingham Heart Study Offspring cohort.

**Supplemental Table 2.** Averaged protein intake, expressed in g/d, and mean annualized changes in outcomes by strata of age, sex, BMI, eGFR, and type 2 diabetes status.

**Supplemental Table 3.** Adjusted least square means of fasting insulin and insulin resistance after 7 years of follow-up by averaged total, animal, and plant protein intake in participants of the Framingham Heart Study Offspring cohort.

**Supplemental Table 4.** Mean annualized changes in outcomes by categories of averaged protein intake, expressed in g/kg body weight/d, in participants of the Framingham Heart Study Offspring cohort.

**Supplemental Table 5.** Mean annualized changes in outcomes by categories of averaged protein intake, expressed in g/kg body weight/d, stratified by body mass index category, in participants of the Framingham Heart Study Offspring cohort.

Supplemental Figure 1. Diagram of mixed model approach of analyzing annualized changes in cardiometabolic outcomes.

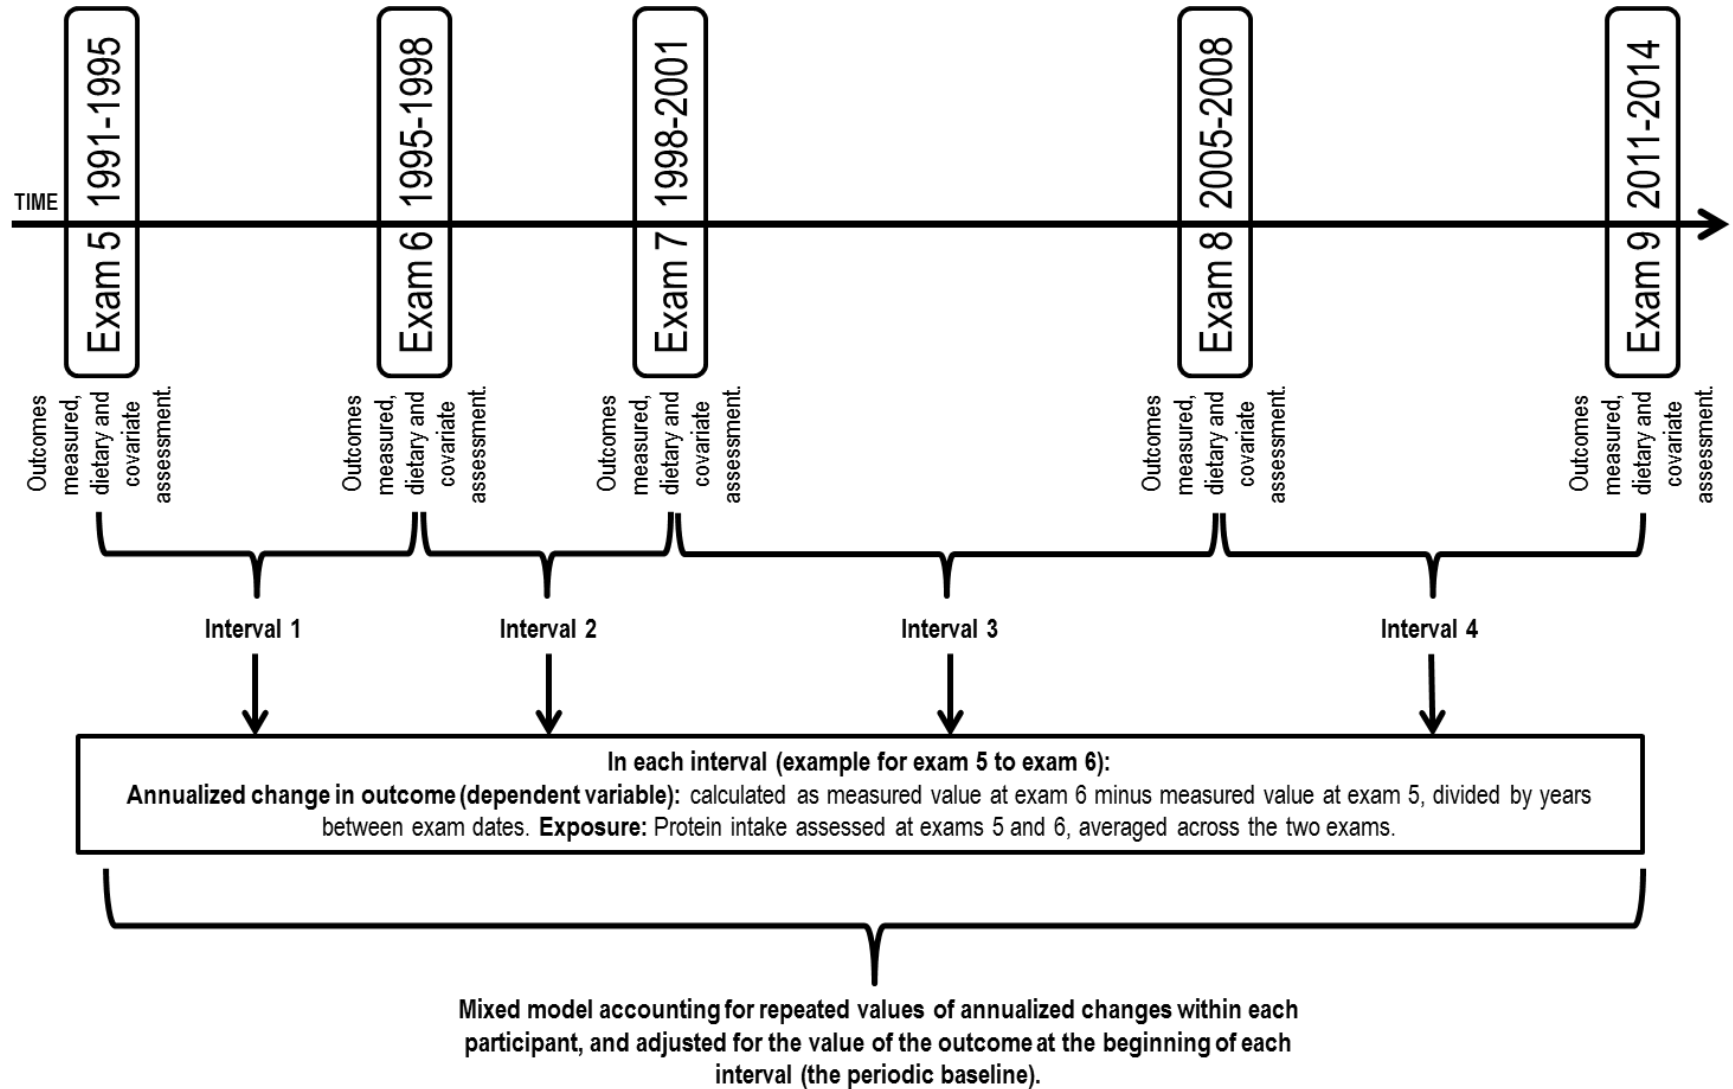

**Supplemental Table 1.** Mean protein intake and status at baseline by body mass index category in 3,066 participants of the Framingham Heart Study Offspring cohort.

|                    | Total sample | Body Mass Index Category |                          |                       |
|--------------------|--------------|--------------------------|--------------------------|-----------------------|
|                    |              | <25 kg/m <sup>2</sup>    | 25–<30 kg/m <sup>2</sup> | ≥30 kg/m <sup>2</sup> |
| <i>N</i>           | 3066         | 1056                     | 1281                     | 729                   |
| Protein, g/d       | 77.5 (15.8)  | 76.6 (15.3)              | 77.4 (15.6)              | 78.8 (16.5)           |
| Protein, g/kg BW/d | 1.04 (0.30)  | 1.24 (0.30)              | 1.00 (0.25)              | 0.83 (0.21)           |
| Protein, % energy  | 16.8 (3.3)   | 16.7 (3.3)               | 16.8 (3.4)               | 17.1 (3.4)            |
| Not meeting RDA, % | 21.5         | 6.2                      | 20.6                     | 45.4                  |

BW, body weight; RDA, US Recommended Dietary Allowance.

**Supplemental Table 2.** Averaged protein intake expressed in g/d, and mean annualized changes in outcomes by strata of age, sex, BMI, eGFR, and type 2 diabetes status.

| Change in outcome                | $\beta$ (SE) per 10 g/d                    |                | $\beta$ (SE) per 10 g/d                    |                | <i>P</i> interaction* |
|----------------------------------|--------------------------------------------|----------------|--------------------------------------------|----------------|-----------------------|
|                                  | averaged protein intake                    | <i>P</i> value | averaged protein intake                    | <i>P</i> value |                       |
|                                  | <i>eGFR</i> <60 mL/min/1.73 m <sup>2</sup> |                | <i>eGFR</i> ≥60 mL/min/1.73 m <sup>2</sup> |                |                       |
| DBP, mmHg                        | -0.011 (0.014)                             | 0.44           | -0.083 (0.040)                             | 0.04           | 0.64                  |
| eGFR, mL/min/1.73 m <sup>2</sup> | 0.018 (0.020)                              | 0.36           | -0.063 (0.045)                             | 0.16           | 0.62                  |
| FG, mmol/L                       | 0.0035 (0.0016)                            | 0.03           | 0.0042 (0.0053)                            | 0.42           | 0.23                  |
| HDL cholesterol, mmol/L          | 0.0004 (0.0004)                            | 0.28           | -0.0009 (0.0012)                           | 0.45           | 0.28                  |
| LDL cholesterol, mmol/L          | -0.0004 (0.0011)                           | 0.69           | -0.0031 (0.0030)                           | 0.30           | 0.76                  |
| SBP, mmHg                        | -0.076 (0.024)                             | 0.002          | -0.259 (0.079)                             | 0.001          | 0.19                  |
| Cholesterol, mmol/L              | 0.0005 (0.0013)                            | 0.69           | -0.0034 (0.0033)                           | 0.31           | 0.48                  |
| Triglycerides, mmol/L            | -0.0010 (0.0010)                           | 0.33           | -0.0010 (0.0028)                           | 0.71           | 0.96                  |
| WC, cm                           | 0.010 (0.007)                              | 0.16           | -0.012 (0.018)                             | 0.49           | 0.01                  |
| Weight, kg                       | 0.007 (0.010)                              | 0.46           | 0.010 (0.026)                              | 0.72           | 0.41                  |
|                                  | <i>Age</i> <58 years                       |                | <i>Age</i> ≥58 years                       |                |                       |
| DBP, mmHg                        | 0.0001 (0.019)                             | 1.00           | -0.035 (0.018)                             | 0.05           | 0.81                  |
| eGFR, mL/min/1.73 m <sup>2</sup> | 0.015 (0.033)                              | 0.65           | 0.063 (0.027)                              | 0.02           | 0.82                  |
| FG, mmol/L                       | 0.0066 (0.0023)                            | 0.004          | 0.0023 (0.0022)                            | 0.31           | 0.86                  |
| HDL cholesterol, mmol/L          | 0.0012 (0.0006)                            | 0.04           | -0.0006 (0.0005)                           | 0.22           | 0.03                  |
| LDL cholesterol, mmol/L          | -0.0023 (0.0015)                           | 0.13           | -0.0002 (0.0014)                           | 0.88           | 0.04                  |
| SBP, mmHg                        | -0.043 (0.030)                             | 0.16           | -0.127 (0.034)                             | 0.0002         | 0.41                  |
| Cholesterol, mmol/L              | -0.0016 (0.0019)                           | 0.40           | 0.0002 (0.0017)                            | 0.88           | 0.01                  |
| Triglycerides, mmol/L            | -0.0021 (0.0016)                           | 0.19           | -0.0005 (0.0012)                           | 0.68           | 0.09                  |
| WC, cm                           | 0.003 (0.010)                              | 0.80           | 0.004 (0.009)                              | 0.67           | 0.20                  |
| Weight, kg                       | 0.017 (0.015)                              | 0.27           | -0.002 (0.012)                             | 0.90           | 0.77                  |

|                                  | <i>BMI &lt;25 kg/m<sup>2</sup></i> |       | <i>BMI ≥25 kg/m<sup>2</sup></i> |        |         |
|----------------------------------|------------------------------------|-------|---------------------------------|--------|---------|
| DBP, mmHg                        | -0.035 (0.023)                     | 0.13  | -0.013 (0.016)                  | 0.41   | 0.17    |
| eGFR, mL/min/1.73 m <sup>2</sup> | 0.003 (0.036)                      | 0.92  | 0.065 (0.026)                   | 0.01   | 0.15    |
| FG, mmol/L                       | -0.0008 (0.0017)                   | 0.66  | 0.0039 (0.0021)                 | 0.06   | 0.31    |
| HDL cholesterol, mmol/L          | 0.0009 (0.0008)                    | 0.24  | 0.0005 (0.0004)                 | 0.19   | 0.77    |
| LDL cholesterol, mmol/L          | -0.0017 (0.0017)                   | 0.32  | -0.0008 (0.0013)                | 0.53   | 0.16    |
| SBP, mmHg                        | -0.124 (0.042)                     | 0.004 | -0.082 (0.028)                  | 0.004  | 0.01    |
| Cholesterol, mmol/L              | 0.0004 (0.0022)                    | 0.86  | -0.0001 (0.0015)                | 0.93   | 0.12    |
| Triglycerides, mmol/L            | 0.0004 (0.0016)                    | 0.79  | -0.0028 (0.0012)                | 0.02   | 0.61    |
| WC, cm                           | -0.024 (0.011)                     | 0.03  | 0.012 (0.008)                   | 0.13   | 0.87    |
| Weight, kg                       | 0.011 (0.011)                      | 0.31  | 0.003 (0.012)                   | 0.81   | 0.88    |
|                                  | <i>Male</i>                        |       | <i>Female</i>                   |        |         |
| DBP, mmHg                        | -0.001 (0.019)                     | 0.97  | -0.035 (0.018)                  | 0.05   | 0.16    |
| eGFR, mL/min/1.73 m <sup>2</sup> | 0.047 (0.030)                      | 0.12  | 0.053 (0.032)                   | 0.09   | 0.69    |
| FG, mmol/L                       | 0.0020 (0.0025)                    | 0.43  | 0.0052 (0.0019)                 | 0.01   | 0.24    |
| HDL cholesterol, mmol/L          | -0.0001 (0.0004)                   | 0.84  | 0.0005 (0.0006)                 | 0.43   | 0.86    |
| LDL cholesterol, mmol/L          | -0.0004 (0.0014)                   | 0.75  | -0.0009 (0.0014)                | 0.51   | 0.73    |
| SBP, mmHg                        | -0.054 (0.034)                     | 0.11  | -0.115 (0.032)                  | 0.0003 | 0.04    |
| Cholesterol, mmol/L              | 0.0003 (0.0017)                    | 0.85  | -0.0002 (0.0017)                | 0.91   | 0.93    |
| Triglycerides, mmol/L            | -0.0002 (0.0015)                   | 0.87  | -0.0015 (0.0012)                | 0.20   | 0.77    |
| WC, cm                           | 0.014 (0.006)                      | 0.02  | -0.004 (0.010)                  | 0.72   | 0.16    |
| Weight, kg                       | 0.012 (0.013)                      | 0.35  | 0.002 (0.013)                   | 0.86   | 0.98    |
|                                  | <i>Type 2 diabetes absent</i>      |       | <i>Type 2 diabetes present</i>  |        |         |
| DBP, mmHg                        | -0.021 (0.014)                     | 0.12  | 0.017 (0.050)                   | 0.74   | 0.21    |
| eGFR, mL/min/1.73 m <sup>2</sup> | 0.046 (0.022)                      | 0.03  | -0.007 (0.092)                  | 0.94   | 0.79    |
| FG, mmol/L                       | -0.0014 (0.0009)                   | 0.11  | 0.0306 (0.0138)                 | 0.03   | <0.001† |

|                         |                  |        |                  |      |        |
|-------------------------|------------------|--------|------------------|------|--------|
| HDL cholesterol, mmol/L | 0.0004 (0.0004)  | 0.32   | -0.0009 (0.0012) | 0.47 | 0.35   |
| LDL cholesterol, mmol/L | -0.0002 (0.0010) | 0.83   | -0.0026 (0.0040) | 0.52 | 0.27   |
| SBP, mmHg               | -0.093 (0.024)   | <0.001 | -0.025 (0.091)   | 0.78 | 0.20   |
| Cholesterol, mmol/L     | 0.0004 (0.0013)  | 0.74   | -0.0007 (0.0045) | 0.88 | 0.85   |
| Triglycerides, mmol/L   | -0.0016 (0.0009) | 0.08   | 0.0009 (0.0050)  | 0.87 | 0.003† |
| WC, cm                  | 0.005 (0.006)    | 0.45   | 0.011 (0.025)    | 0.68 | 0.93   |
| Weight, kg              | 0.009 (0.009)    | 0.35   | -0.021 (0.040)   | 0.60 | 0.21   |

DBP, diastolic blood pressure; eGFR, estimated glomerular filtration rate; FG, fasting glucose; HDL, high-density lipoprotein; LDL, low-density lipoprotein; SBP, systolic blood pressure; TG, triglyceride; WC, waist circumference.

\*Interactions were modeled using continuous cross-product terms and corresponding first-order terms. The model was otherwise adjusted for age; sex; energy intake; the baseline measure of the outcome (i.e., the value at the beginning of the exam interval); smoking status; alcohol intake; pharmacological treatment for dyslipidemia, cardiovascular disease, hypertension, or diabetes; history of cancer; change in weight, except for when the outcome was change in weight; and the Dietary Guidelines for Americans 2010 Index Score.

†Interactions significant at the corrected *P* value. Given the 5 hypothesis-free interaction tests for each outcome, a Bonferroni-corrected *P* value was used, with a significance cut point of <0.01 (0.05/5).

**Supplemental Table 3.** Adjusted least square means of fasting insulin and insulin resistance after 7 years of follow-up by averaged total, animal, and plant protein intake in participants of the Framingham Heart Study Offspring cohort.

|                         |        | Adjusted least square mean (SE) per quartile category of averaged intake (g/d) |             |             |             |             |         |
|-------------------------|--------|--------------------------------------------------------------------------------|-------------|-------------|-------------|-------------|---------|
|                         |        | <i>Total protein</i>                                                           |             |             |             |             |         |
| Outcome at exam 7       | Model* | N                                                                              | 64.4        | 74.6        | 82.5        | 93.3        | P trend |
| Fasting insulin, mU/mL† | 1      | 2422                                                                           | 2.57 (0.04) | 2.59 (0.03) | 2.61 (0.04) | 2.58 (0.03) | 0.31    |
|                         | 2      | 2422                                                                           | 2.65 (0.04) | 2.65 (0.04) | 2.66 (0.04) | 2.62 (0.04) | 0.33    |
|                         | 3      | 2410                                                                           | 2.64 (0.04) | 2.65 (0.04) | 2.66 (0.04) | 2.62 (0.04) | 0.34    |
| HOMA-IR†                | 1      | 2422                                                                           | 1.22 (0.04) | 1.26 (0.04) | 1.28 (0.04) | 1.27 (0.04) | 0.046   |
|                         | 2      | 2422                                                                           | 1.37 (0.04) | 1.38 (0.04) | 1.39 (0.04) | 1.36 (0.04) | 0.84    |
|                         | 3      | 2410                                                                           | 1.37 (0.05) | 1.39 (0.04) | 1.40 (0.04) | 1.37 (0.04) | 0.96    |
|                         |        | <i>Animal protein</i>                                                          |             |             |             |             |         |
|                         |        |                                                                                | 39.9        | 50.0        | 58.0        | 69.6        | P trend |
| Fasting insulin, mU/mL† | 1      | 2422                                                                           | 2.57 (0.04) | 2.58 (0.03) | 2.62 (0.03) | 2.59 (0.03) | 0.24    |
|                         | 2      | 2422                                                                           | 2.64 (0.04) | 2.64 (0.04) | 2.66 (0.04) | 2.63 (0.04) | 0.82    |
|                         | 3      | 2410                                                                           | 2.64 (0.04) | 2.64 (0.04) | 2.66 (0.04) | 2.63 (0.04) | 0.73    |
| HOMA-IR†                | 1      | 2422                                                                           | 1.23 (0.04) | 1.24 (0.04) | 1.29 (0.04) | 1.27 (0.04) | 0.04    |
|                         | 2      | 2422                                                                           | 1.37 (0.05) | 1.37 (0.04) | 1.40 (0.04) | 1.37 (0.04) | 0.68    |
|                         | 3      | 2410                                                                           | 1.38 (0.05) | 1.37 (0.04) | 1.41 (0.04) | 1.38 (0.04) | 0.72    |
|                         |        | <i>Plant protein</i>                                                           |             |             |             |             |         |
|                         |        |                                                                                | 64.4        | 74.6        | 82.5        | 93.3        | P trend |
| Fasting insulin, mU/mL† | 1      | 2422                                                                           | 2.58 (0.04) | 2.60 (0.03) | 2.61 (0.03) | 2.55 (0.04) | 0.25    |
|                         | 2      | 2422                                                                           | 2.65 (0.04) | 2.65 (0.04) | 2.66 (0.04) | 2.61 (0.04) | 0.18    |
|                         | 3      | 2410                                                                           | 2.65 (0.04) | 2.65 (0.04) | 2.66 (0.04) | 2.61 (0.04) | 0.25    |
| HOMA-IR†                | 1      | 2422                                                                           | 1.26 (0.04) | 1.27 (0.04) | 1.27 (0.04) | 1.21 (0.04) | 0.15    |
|                         | 2      | 2422                                                                           | 1.39 (0.04) | 1.38 (0.04) | 1.39 (0.04) | 1.34 (0.05) | 0.09    |
|                         | 3      | 2410                                                                           | 1.39 (0.05) | 1.39 (0.04) | 1.39 (0.04) | 1.34 (0.05) | 0.16    |

HOMA-IR, homeostatic model assessment of insulin resistance.

\*Model 1 was adjusted for age; sex; energy intake; and the baseline measure of the outcome (i.e., the value at exam 5). Model 2 was adjusted as for model 1, plus smoking status; alcohol intake; pharmacological treatment for dyslipidemia, cardiovascular disease, hypertension, or diabetes; and history of cancer. Model 2 also included change in weight between exams 5 and 7. Model 3 was additionally adjusted for the Dietary Guidelines for Americans 2010 Index Score.

†Means are expressed on the natural log scale.



**Supplemental Table 4.** Mean annualized changes in outcomes by categories of averaged protein intake, expressed in g/kg body weight/d, in participants of the Framingham Heart Study Offspring cohort.

| Annualized<br>change in...       | Model | Adjusted mean annualized change (SE) per<br>quartile category of averaged protein intake (g/kg/d) |                |                |                | P<br>trend | $\beta$ (SE) per 1 g/kg/d<br>averaged protein<br>intake | P<br>continuous |
|----------------------------------|-------|---------------------------------------------------------------------------------------------------|----------------|----------------|----------------|------------|---------------------------------------------------------|-----------------|
|                                  |       | 0.7                                                                                               | 0.9            | 1.1            | 1.4            |            |                                                         |                 |
| DBP, mmHg                        | 1     | -0.23 (0.04)                                                                                      | -0.16 (0.03)   | -0.11 (0.03)   | -0.25 (0.04)   | 0.59       | -0.083 (0.069)                                          | 0.23            |
|                                  | 2     | -0.21 (0.04)                                                                                      | -0.14 (0.03)   | -0.10 (0.03)   | -0.26 (0.03)   | 0.28       | -0.108 (0.065)                                          | 0.10            |
|                                  | 3     | -0.23 (0.04)                                                                                      | -0.14 (0.03)   | -0.09 (0.03)   | -0.25 (0.03)   | 0.45       | -0.090 (0.068)                                          | 0.19            |
| eGFR, mL/min/1.73 m <sup>2</sup> | 1     | -1.18 (0.06)                                                                                      | -1.07 (0.05)   | -0.88 (0.05)   | -0.75 (0.06)   | <.0001     | 0.482 (0.115)                                           | <.0001          |
|                                  | 2     | -1.10 (0.06)                                                                                      | -1.01 (0.05)   | -0.87 (0.05)   | -0.81 (0.06)   | 0.001      | 0.310 (0.113)                                           | 0.01            |
|                                  | 3     | -1.09 (0.06)                                                                                      | -1.01 (0.05)   | -0.87 (0.05)   | -0.81 (0.06)   | 0.002      | 0.300 (0.116)                                           | 0.01            |
| FG, mmol/L                       | 1     | 0.039 (0.004)                                                                                     | 0.025 (0.004)  | 0.016 (0.004)  | -0.004 (0.004) | <.0001     | -0.054 (0.007)                                          | <.0001          |
|                                  | 2     | 0.039 (0.004)                                                                                     | 0.026 (0.004)  | 0.017 (0.004)  | 0.000 (0.004)  | <.0001     | -0.050 (0.008)                                          | <.0001          |
|                                  | 3     | 0.040 (0.004)                                                                                     | 0.026 (0.004)  | 0.017 (0.004)  | -0.001 (0.004) | <.0001     | -0.053 (0.008)                                          | <.0001          |
| HDL cholesterol, mmol/L          | 1     | 0.010 (0.001)                                                                                     | 0.012 (0.001)  | 0.016 (0.001)  | 0.019 (0.001)  | <.0001     | 0.014 (0.002)                                           | <.0001          |
|                                  | 2     | 0.009 (0.001)                                                                                     | 0.012 (0.001)  | 0.016 (0.001)  | 0.019 (0.001)  | <.0001     | 0.014 (0.002)                                           | <.0001          |
|                                  | 3     | 0.010 (0.001)                                                                                     | 0.012 (0.001)  | 0.015 (0.001)  | 0.018 (0.001)  | <.0001     | 0.013 (0.002)                                           | <.0001          |
| LDL cholesterol, mmol/L          | 1     | -0.048 (0.003)                                                                                    | -0.045 (0.003) | -0.041 (0.003) | -0.040 (0.003) | 0.06       | 0.005 (0.005)                                           | 0.30            |
|                                  | 2     | -0.041 (0.003)                                                                                    | -0.038 (0.002) | -0.037 (0.002) | -0.044 (0.003) | 0.44       | -0.009 (0.005)                                          | 0.06            |
|                                  | 3     | -0.042 (0.003)                                                                                    | -0.038 (0.002) | -0.037 (0.002) | -0.043 (0.003) | 0.59       | -0.009 (0.005)                                          | 0.09            |
| SBP, mmHg                        | 1     | 0.12 (0.06)                                                                                       | 0.18 (0.06)    | 0.33 (0.06)    | 0.00 (0.06)    | 0.20       | -0.268 (0.114)                                          | 0.02            |
|                                  | 2     | 0.10 (0.06)                                                                                       | 0.23 (0.06)    | 0.38 (0.06)    | 0.03 (0.06)    | 0.39       | -0.213 (0.113)                                          | 0.06            |
|                                  | 3     | 0.09 (0.06)                                                                                       | 0.22 (0.06)    | 0.39 (0.06)    | 0.02 (0.06)    | 0.34       | -0.241 (0.119)                                          | 0.04            |
| Cholesterol, mmol/L              | 1     | -0.049 (0.003)                                                                                    | -0.043 (0.003) | -0.030 (0.003) | -0.023 (0.003) | <.0001     | 0.032 (0.006)                                           | <.0001          |
|                                  | 2     | -0.044 (0.003)                                                                                    | -0.035 (0.003) | -0.026 (0.003) | -0.027 (0.003) | 0.0004     | 0.019 (0.006)                                           | 0.001           |
|                                  | 3     | -0.045 (0.003)                                                                                    | -0.035 (0.003) | -0.026 (0.003) | -0.026 (0.003) | 0.0001     | 0.021 (0.006)                                           | 0.001           |
| Triglycerides, mmol/L            | 1     | -0.011 (0.003)                                                                                    | -0.018 (0.002) | -0.021 (0.002) | -0.035 (0.002) | <.0001     | -0.030 (0.005)                                          | <.0001          |

|                         |   |                |                |                |                |        |                |        |
|-------------------------|---|----------------|----------------|----------------|----------------|--------|----------------|--------|
|                         | 2 | -0.013 (0.003) | -0.018 (0.002) | -0.020 (0.002) | -0.032 (0.002) | <.0001 | -0.024 (0.005) | <.0001 |
|                         | 3 | -0.015 (0.003) | -0.019 (0.002) | -0.020 (0.002) | -0.032 (0.002) | <.0001 | -0.021 (0.005) | <.0001 |
| Waist circumference, cm | 1 | 1.02 (0.03)    | 0.71 (0.03)    | 0.45 (0.03)    | 0.02 (0.03)    | <.0001 | -1.454 (0.065) | <.0001 |
|                         | 2 | 0.65 (0.02)    | 0.60 (0.02)    | 0.52 (0.02)    | 0.36 (0.02)    | <.0001 | -0.467 (0.038) | <.0001 |
|                         | 3 | 0.65 (0.02)    | 0.59 (0.02)    | 0.52 (0.02)    | 0.37 (0.02)    | <.0001 | -0.469 (0.040) | <.0001 |
| Weight, kg              | 1 | 0.49 (0.03)    | 0.19 (0.02)    | -0.03 (0.02)   | -0.29 (0.03)   | <.0001 | -1.049 (0.059) | <.0001 |
|                         | 2 | 0.50 (0.03)    | 0.18 (0.02)    | -0.04 (0.02)   | -0.30 (0.03)   | <.0001 | -1.074 (0.061) | <.0001 |
|                         | 3 | 0.54 (0.03)    | 0.19 (0.02)    | -0.05 (0.02)   | -0.33 (0.03)   | <.0001 | -1.181 (0.064) | <.0001 |

DBP, diastolic blood pressure; eGFR, estimated glomerular filtration rate; FG, fasting glucose; HDL, high-density lipoprotein; LDL, low-density lipoprotein; SBP, systolic blood pressure.

\*Model 1 was adjusted for age; sex; energy intake; and the baseline measure of the outcome (i.e., the value at the beginning of the exam interval). Model 2 was adjusted as for model 1, plus smoking status; alcohol intake; pharmacological treatment for dyslipidemia, cardiovascular disease, hypertension, or diabetes; and history of cancer. Model 2 also included change in weight, except for when the outcome was change in weight. In model 3, we additionally adjusted for the Dietary Guidelines for Americans 2010 Index Score.

**Supplemental Table 5.** Mean annualized changes in outcomes by categories of averaged protein intake, expressed in g/kg body weight/d, stratified by body mass index category, in participants of the Framingham Heart Study Offspring cohort.\*

| <b>Annualized change in...</b>   | <b>BMI Cat.<br/>(kg/m<sup>2</sup>)</b> | <b>β (SE) per g/kg BW/d<br/>averaged protein intake</b> | <b>P continuous</b> |
|----------------------------------|----------------------------------------|---------------------------------------------------------|---------------------|
| Diastolic BP, mmHg               | <25                                    | -0.232 (0.117)                                          | 0.05                |
|                                  | 25-<30                                 | -0.164 (0.138)                                          | 0.24                |
|                                  | ≥30                                    | 0.304 (0.199)                                           | 0.13                |
| eGFR, mL/min/1.73 m <sup>2</sup> | <25                                    | 0.201 (0.182)                                           | 0.27                |
|                                  | 25-<30                                 | 0.370 (0.218)                                           | 0.09                |
|                                  | ≥30                                    | 0.375 (0.328)                                           | 0.25                |
| Fasting plasma glucose, mmol/L   | <25                                    | -0.014 (0.009)                                          | 0.12                |
|                                  | 25-<30                                 | -0.005 (0.015)                                          | 0.72                |
|                                  | ≥30                                    | -0.059 (0.030)                                          | 0.05                |
| HDL cholesterol, mmol/L          | <25                                    | 0.011 (0.004)                                           | 0.01                |
|                                  | 25-<30                                 | 0.005 (0.004)                                           | 0.19                |
|                                  | ≥30                                    | 0.007 (0.005)                                           | 0.12                |
| LDL cholesterol, mmol/L          | <25                                    | -0.017 (0.009)                                          | 0.06                |
|                                  | 25-<30                                 | -0.003 (0.011)                                          | 0.78                |
|                                  | ≥30                                    | 0.020 (0.015)                                           | 0.18                |
| Systolic BP, mmHg                | <25                                    | -0.511 (0.217)                                          | 0.02                |
|                                  | 25-<30                                 | -0.145 (0.242)                                          | 0.55                |
|                                  | ≥30                                    | 0.154 (0.356)                                           | 0.66                |
| Cholesterol, mmol/L              | <25                                    | 0.006 (0.011)                                           | 0.57                |
|                                  | 25-<30                                 | 0.009 (0.013)                                           | 0.47                |
|                                  | ≥30                                    | 0.034 (0.017)                                           | 0.04                |
| Triglycerides, mmol/L            | <25                                    | -0.007 (0.008)                                          | 0.40                |
|                                  | 25-<30                                 | -0.015 (0.011)                                          | 0.15                |

|                         |        |                |        |
|-------------------------|--------|----------------|--------|
|                         | ≥30    | -0.020 (0.013) | 0.13   |
| Waist circumference, cm | <25    | -0.511 (0.065) | <.0001 |
|                         | 25-<30 | -0.271 (0.068) | <.0001 |
|                         | ≥30    | -0.775 (0.118) | <.0001 |
| Weight, kg              | <25    | -0.586 (0.068) | <.0001 |
|                         | 25-<30 | -1.133 (0.092) | <.0001 |
|                         | ≥30    | -2.396 (0.212) | <.0001 |

BMI, body mass index; BP, blood pressure; BW, body weight; eGFR, estimated glomerular filtration rate; HDL, high-density lipoprotein; LDL, low-density lipoprotein.

\*The model was adjusted for age; sex; energy intake; the baseline measure of the outcome (i.e., the value at the beginning of the exam interval); smoking status; alcohol intake; pharmacological treatment for dyslipidemia, cardiovascular disease, hypertension, or diabetes; history of cancer; change in weight, except for when the outcome was change in weight; and the Dietary Guidelines for Americans 2010 Index Score.
